# Supplementary material for: Knockout of ACE-N facilitates improved cardiac function after myocardial infarction
Source: PubMed Central journal article supplement — J Mol Cell Cardiol Plus. 2022 Nov 29;3:100024. doi: 10.1016/j.jmccpl.2022.100024 (PMC9910327; doi:10.1016/j.jmccpl.2022.100024), 2022-11-29
Supplement: NIHMS1863007-supplement-supplementary_material.pdf [file NIHMS1863007-supplement-supplementary_material.pdf]

Representative film developed for SERCA2 and GAPDH antibody

Blot-1

Abbreviation used:

A: ACE-NKO

W and WT: Wild Type

Sham

MI: Myocardial Infarction

SDKP: Ac-SDKP + MI

883: ACE-NKO-Sham

493: WT-Sham

152: ACE-NKO-MI

492: WT-MI

731: ACE-NKO- MI + Ac-SDKP

474: WT- MI + Ac-SDKP

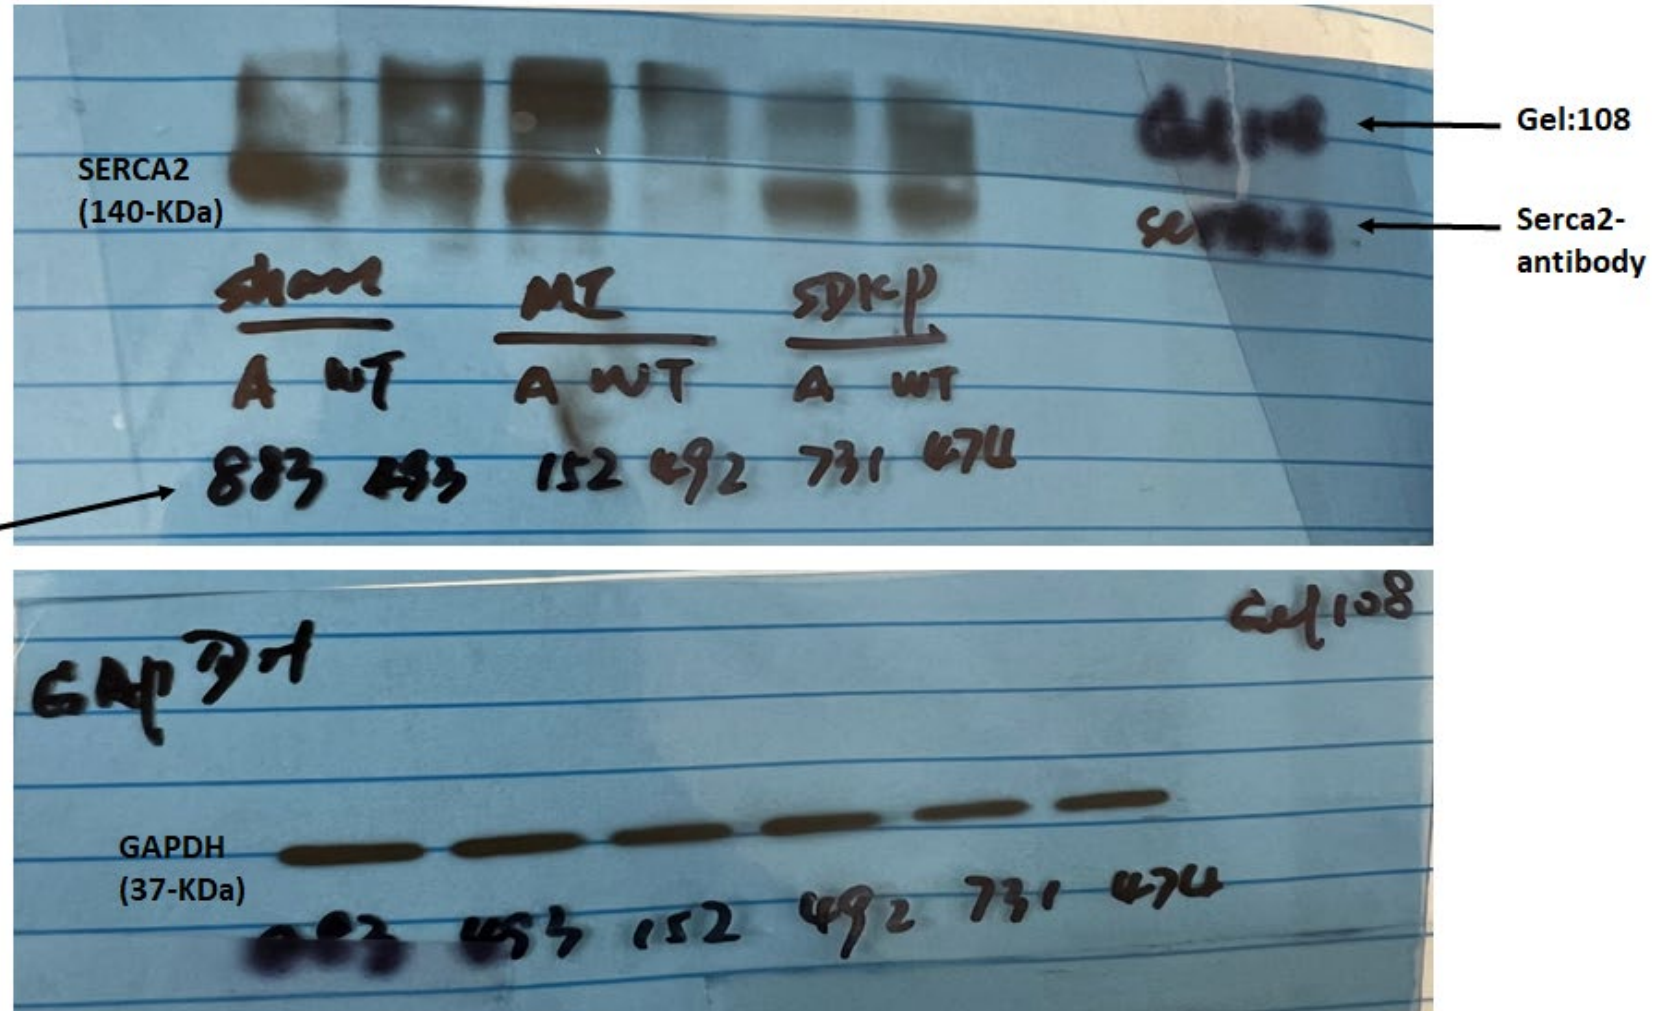

## Blot-2

Abbreviation used:  
A: ACE-NKO  
W and WT: Wild Type  
Sham  
MI: Myocardial Infarction  
SDKP: Ac-SDKP + MI

885: ACE-NKO-Sham  
494: WT-Sham  
736: ACE-NKO-MI  
490: WT-MI  
793: ACE-NKO- MI + Ac-SDKP  
486: WT- MI + Ac-SDKP

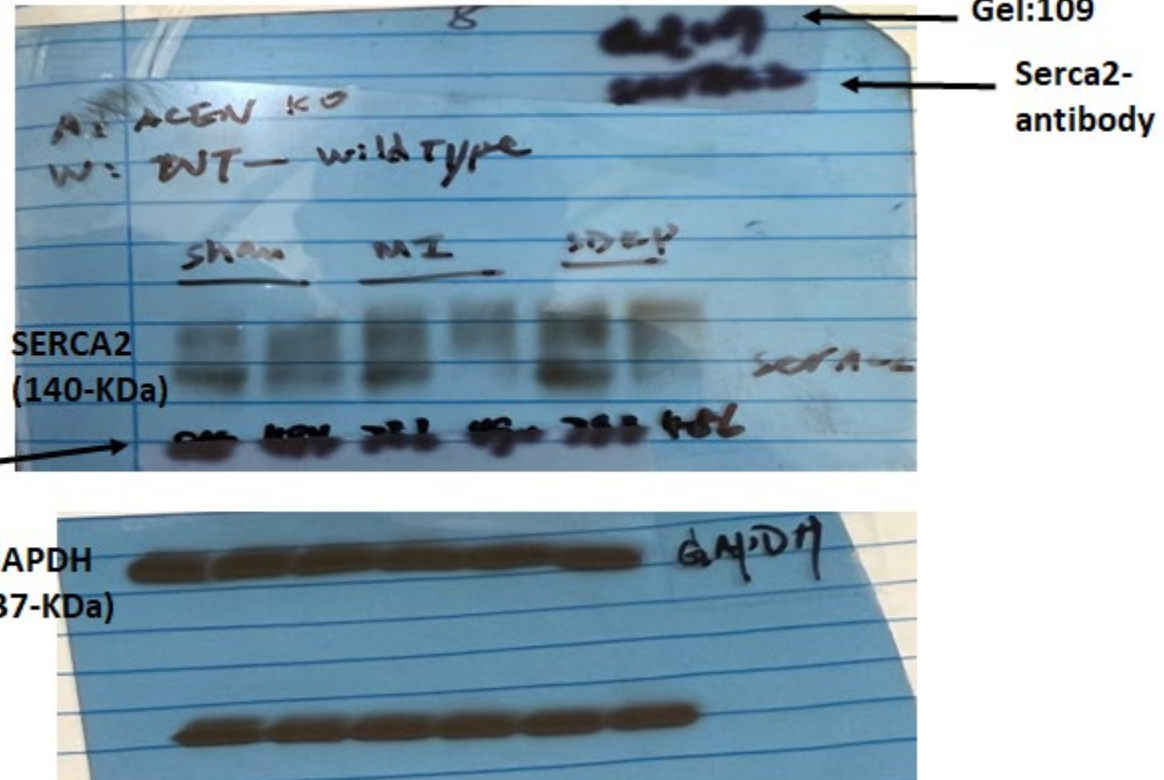

### Blot-3

Abbreviation used:

A: ACE-NKO

W and WT: Wild Type

Sham

MI: Myocardial Infarction

SDKP: Ac-SDKP + MI

Gel:110 →

Serca2-  
antibody →

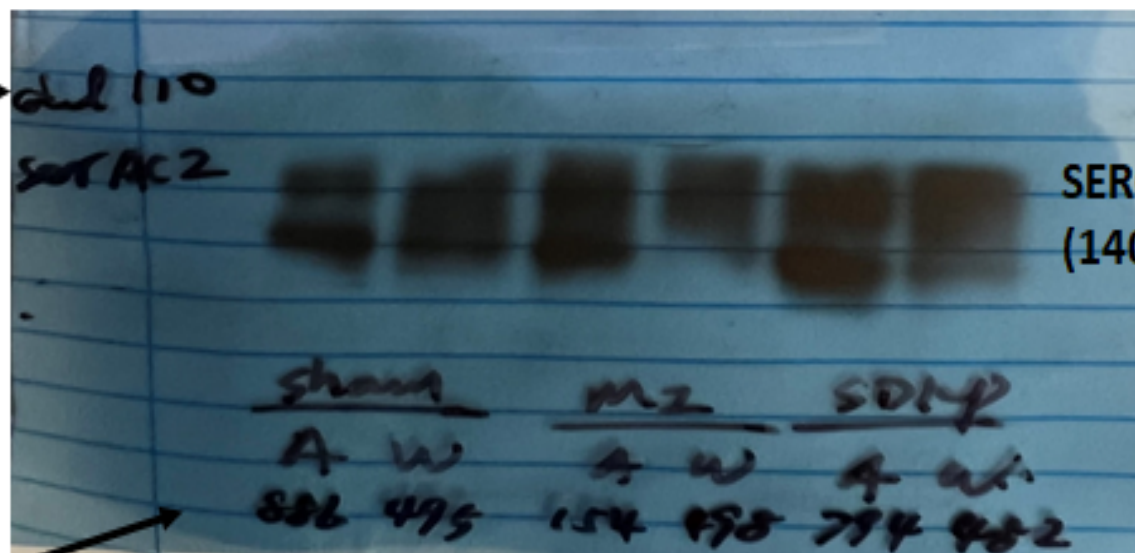

SERCA2  
(140-KDa)

886: ACE-NKO-Sham

494: WT-Sham

154: ACE-NKO-MI

498: WT-MI

794: ACE-NKO- MI + Ac-SDKP

482: WT- MI + Ac-SDKP

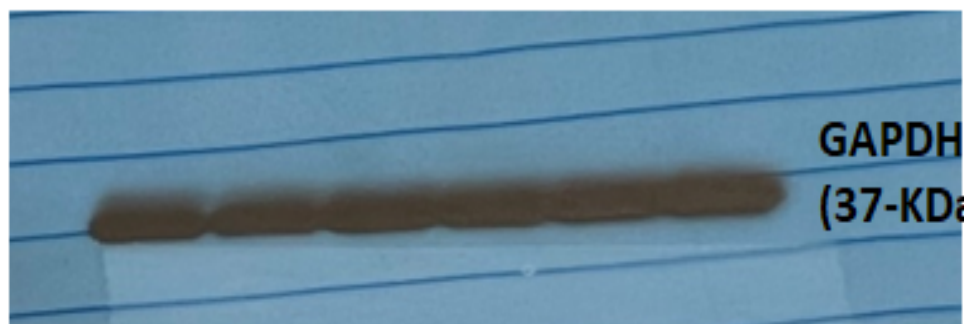

GAPDH  
(37-KDa)



### Blot-4

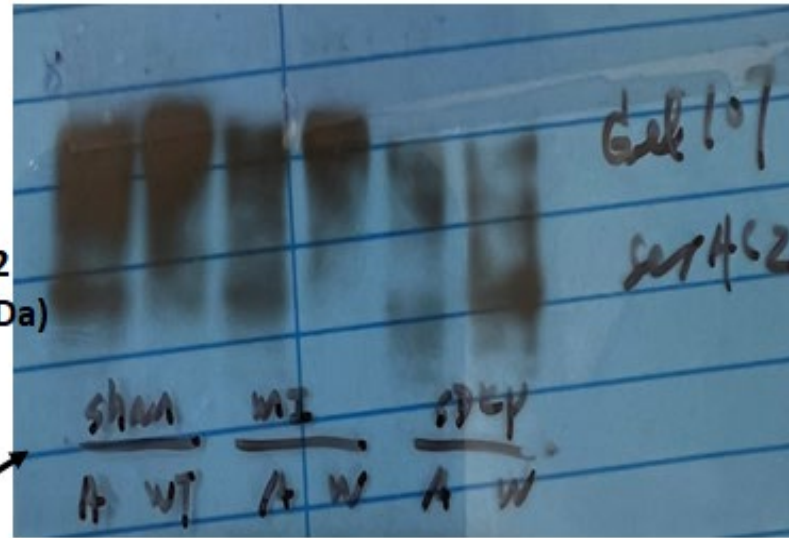

Abbreviation used:

A: ACE-NKO

W and WT: Wild Type

Sham

MI: Myocardial Infarction

SDKP: Ac-SDKP + MI

849: ACE-NKO-Sham

496: WT-Sham

773: ACE-NKO-MI

467: WT-MI

730: ACE-NKO- MI + Ac-SDKP

491: WT- MI + Ac-SDKP

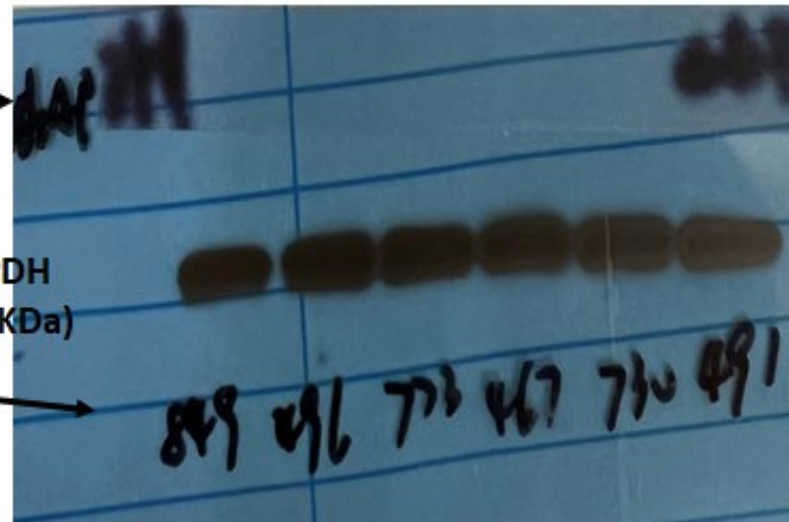

**Abbreviation used:**

**A:** ACE-NKO

**W and WT:** Wild Type

**Sham**

**MI:** Myocardial Infarction

**SDKP:** Ac-SDKP + MI

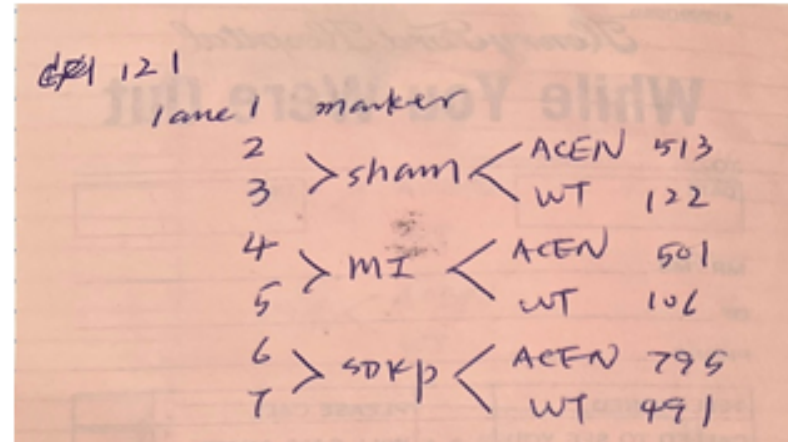

**513:** ACE-NKO-Sham

**122:** WT-Sham

**501:** ACE-NKO-MI

**106:** WT-MI

**795:** ACE-NKO- MI + Ac-SDKP

**491:** WT- MI + Ac-SDKP

**Blot-5**

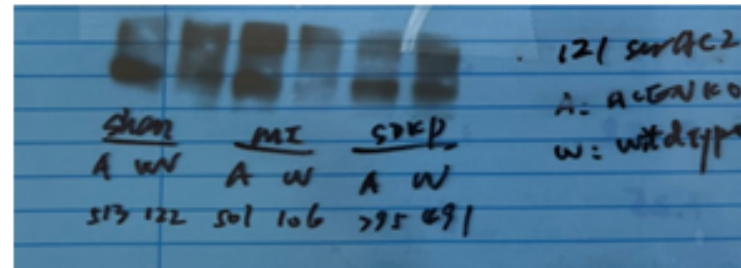

← Gel:121

← Serca2-antibody

Gel:121 →

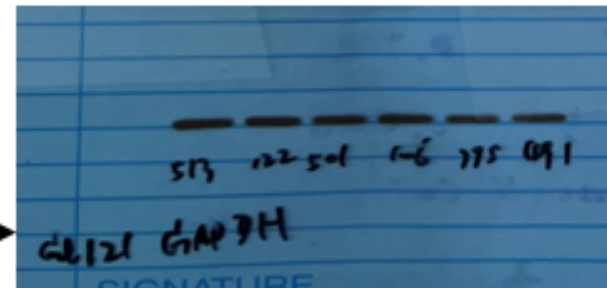

### Blot-6

Abbreviation used:  
 A: ACE-NKO  
 W and WT: Wild Type  
 Sham  
 MI: Myocardial Infarction  
 SDKP: Ac-SDKP + MI

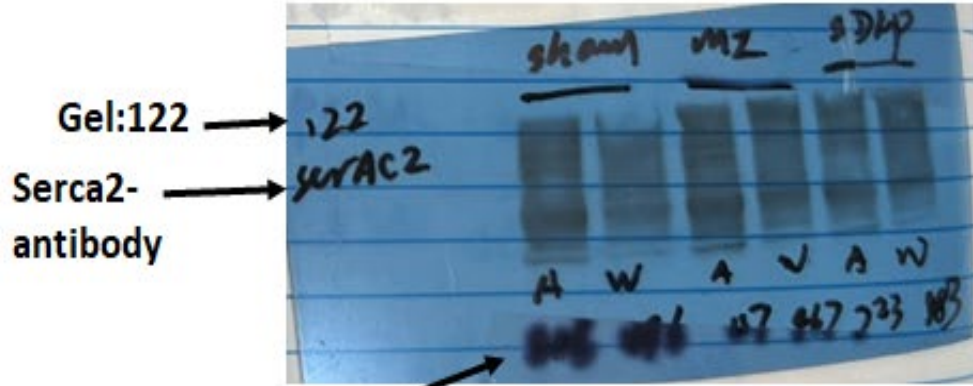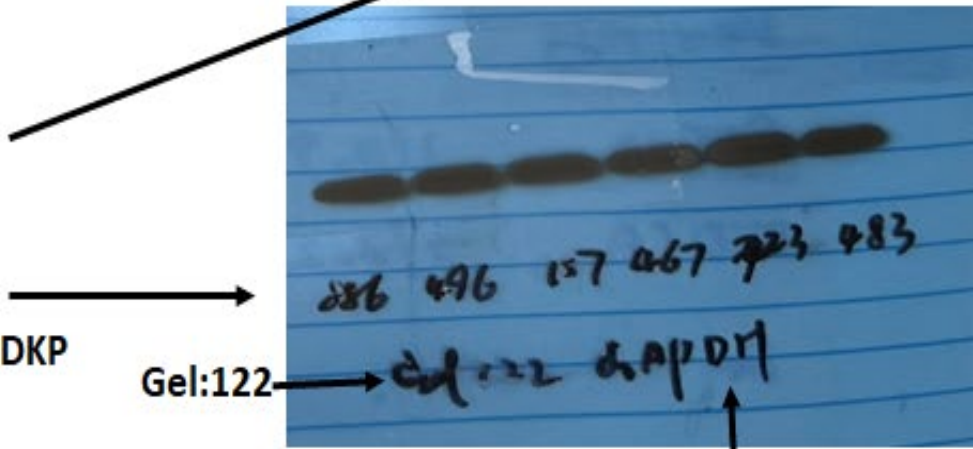

886: ACE-NKO-Sham  
 496: WT-Sham  
 157: ACE-NKO-MI  
 467: WT-MI  
 723: ACE-NKO- MI + Ac-SDKP  
 483: WT- MI + Ac-SDKP

| Gel 122 | lane | marker  | value |
|---------|------|---------|-------|
| 2       | sham | ACE-NKO | 886   |
|         |      | WT      | 496   |
| 4       | MI   | ACE-NKO | 157   |
|         |      | WT      | 467   |
| 6       | SDKP | ACE-NKO | 723   |
|         |      | WT      | 483   |

GAPDH

## Representative film developed for Phospholamban (PLBN) and GAPDH antibody

Abbreviation used:

A: ACE-NKO

W and WT: Wild Type

Sham

MI: Myocardial Infarction

SDKP: Ac-SDKP + MI

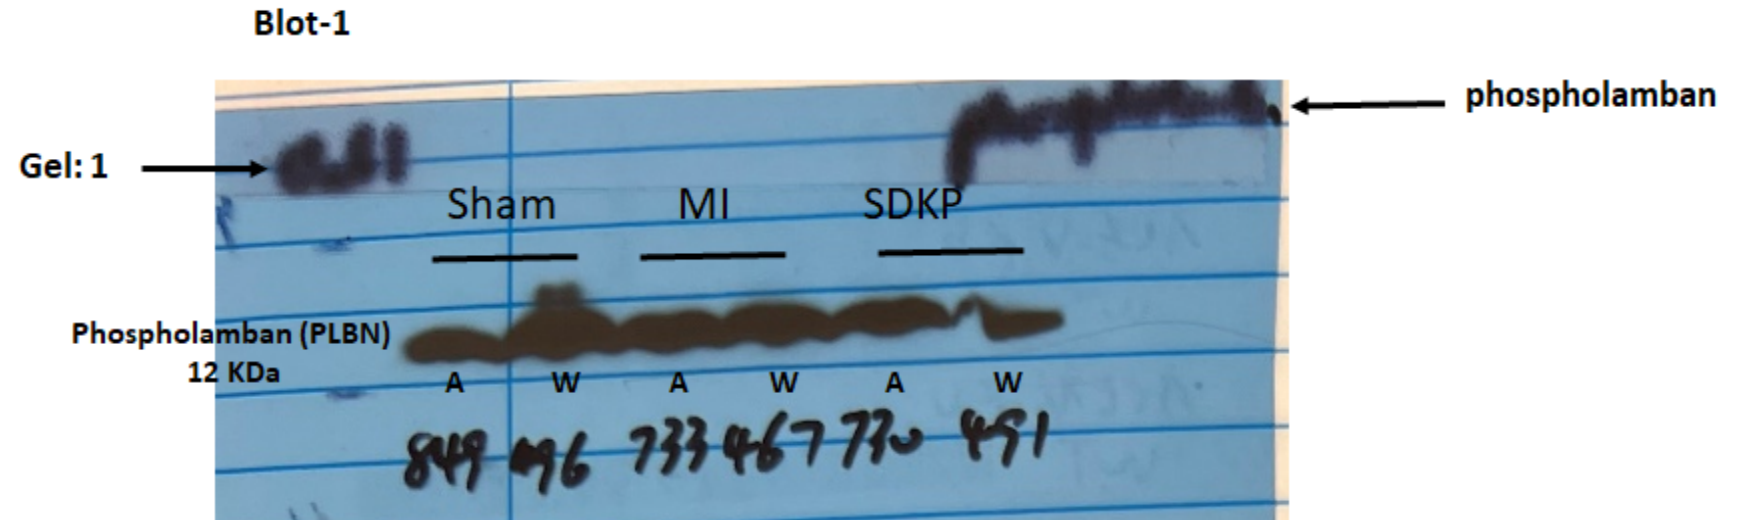

849: ACE-NKO-Sham

496: WT-Sham

733 ACE-NKO-MI

467: WT-MI

730: ACE-NKO- MI + Ac-SDKP

491: WT- MI + Ac-SDKP

GAPDH  
37 KDa

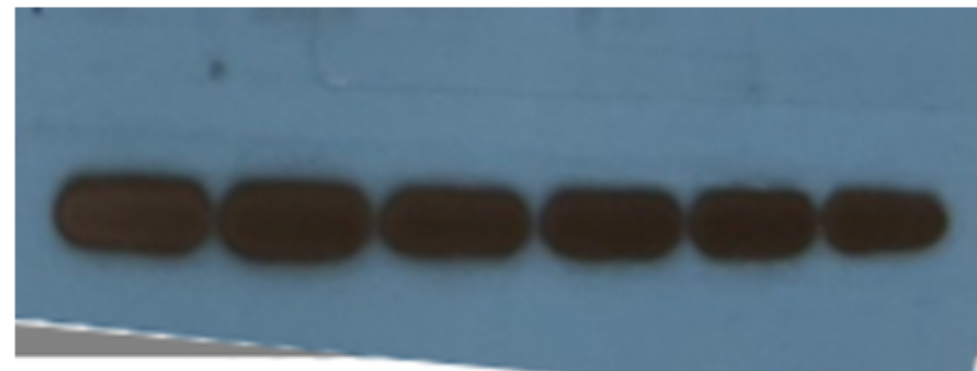



Abbreviation used:  
A: ACE-NKO  
W and WT: Wild Type  
Sham  
MI: Myocardial Infarction  
SDKP: Ac-SDKP + MI

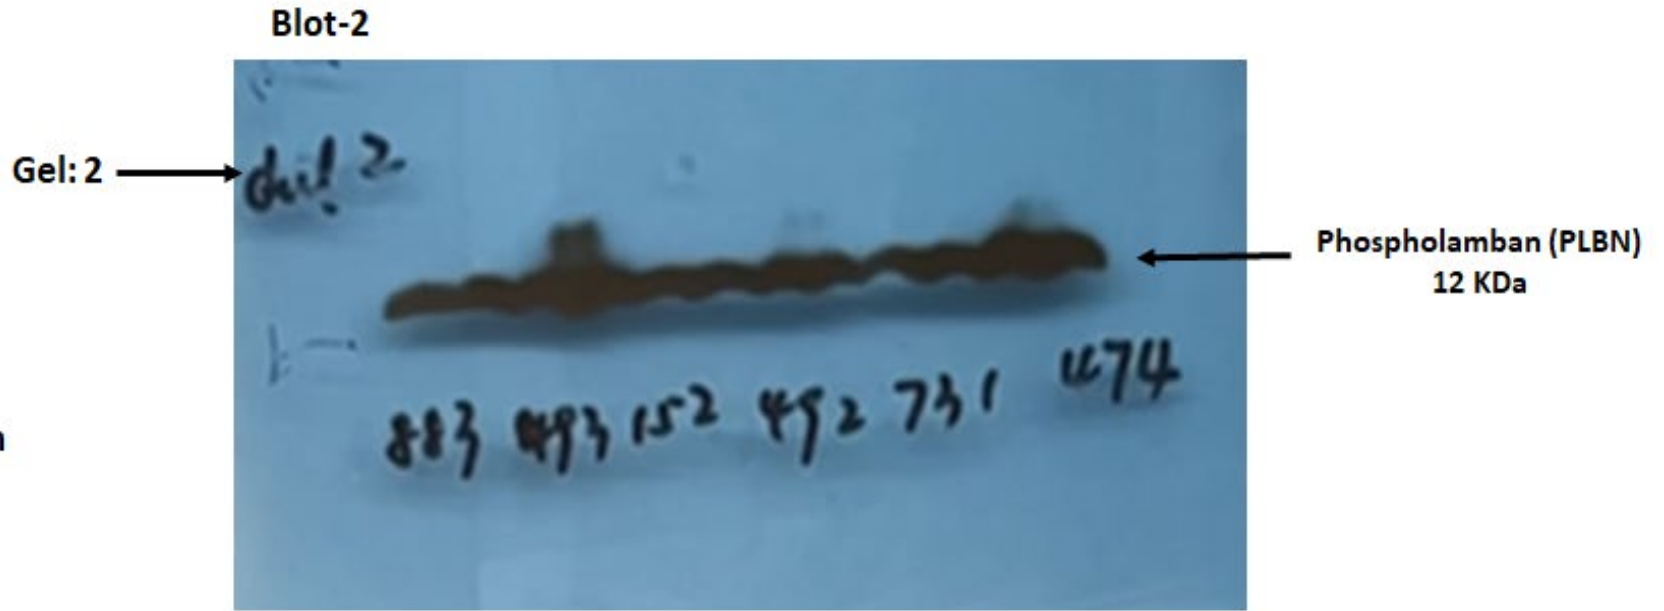

883: ACE-NKO-Sham  
493: WT-Sham  
152 ACE-NKO-MI  
492: WT-MI  
731: ACE-NKO- MI + Ac-SDKP  
474: WT- MI + Ac-SDKP

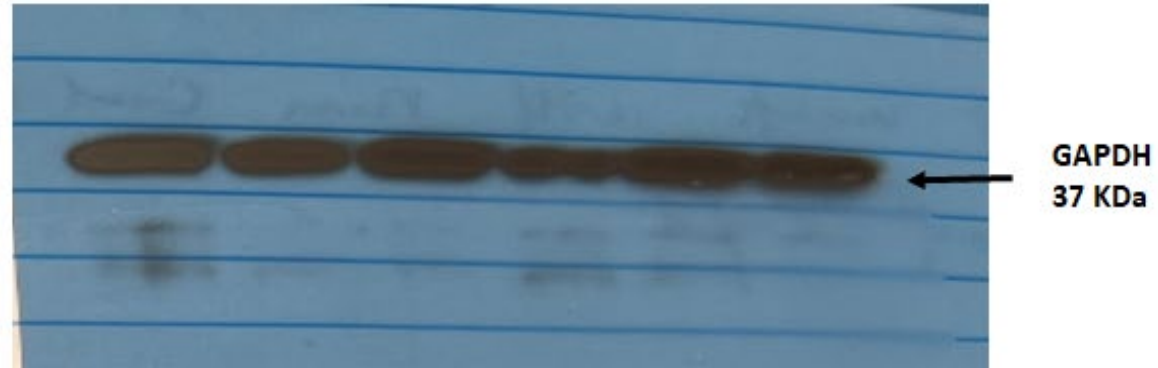



**Abbreviation used:**

A: ACE-NKO

W and WT: Wild Type

Sham

MI: Myocardial Infarction

SDKP: Ac-SDKP + MI

885: ACE-NKO-Sham

494: WT-Sham

736 ACE-NKO-MI

490: WT-MI

730: ACE-NKO- MI + Ac-SDKP

486: WT- MI + Ac-SDKP

**Blot-3**

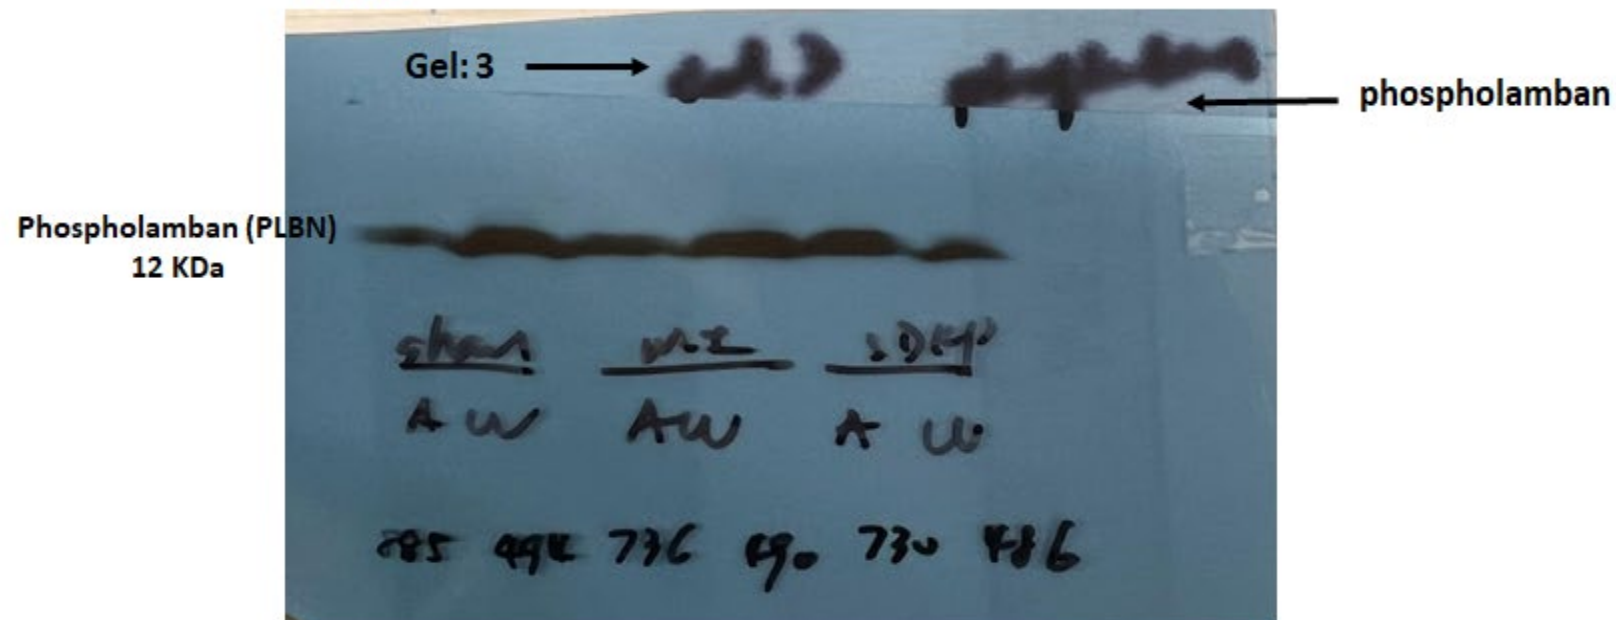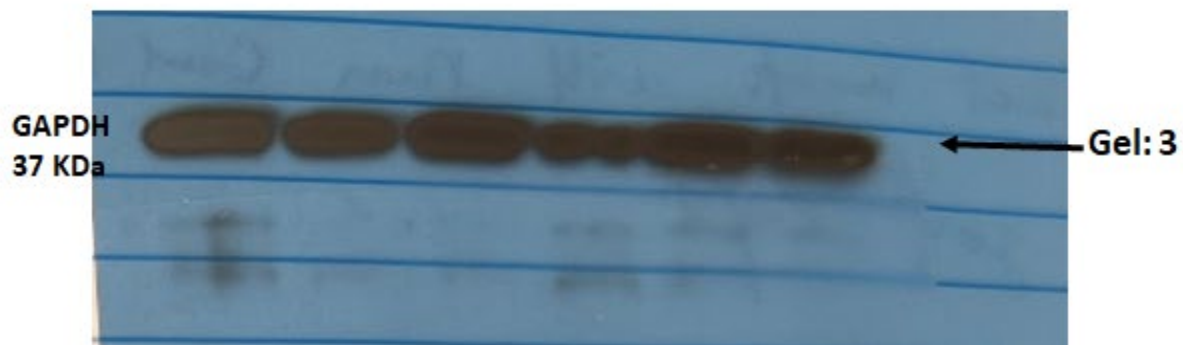

Blot-4

Abbreviation used:  
A: ACE-NKO  
W and WT: Wild Type  
Sham  
MI: Myocardial Infarction  
SDKP: Ac-SDKP + MI

886: ACE-NKO-Sham  
496: WT-Sham  
157: ACE-NKO-MI  
467: WT-MI  
723: ACE-NKO- MI + Ac-SDKP  
483: WT- MI + Ac-SDKP

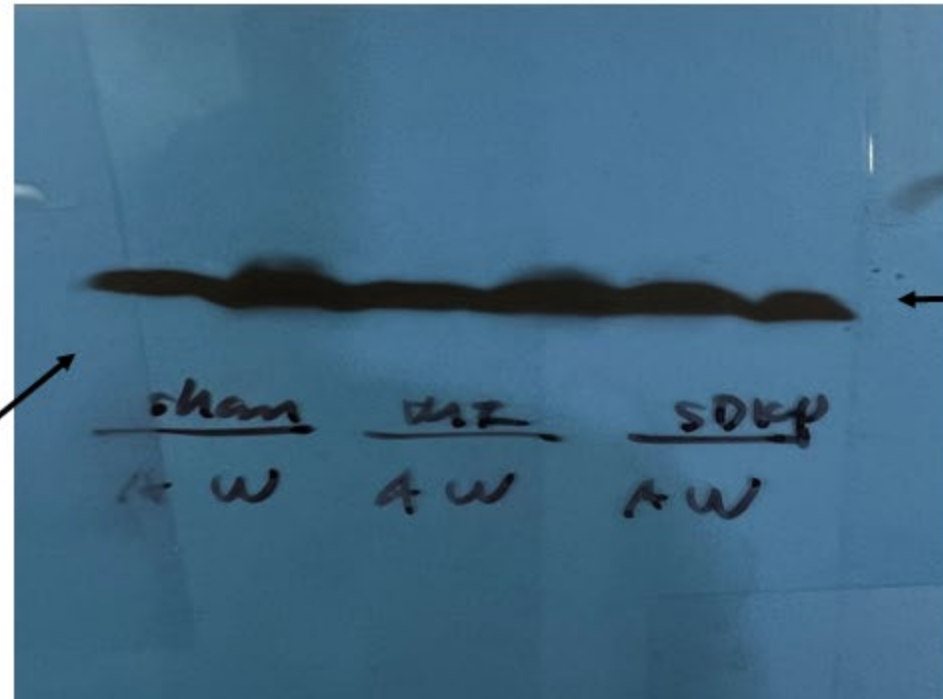

Phospholamban (PLBN)  
12 KDa

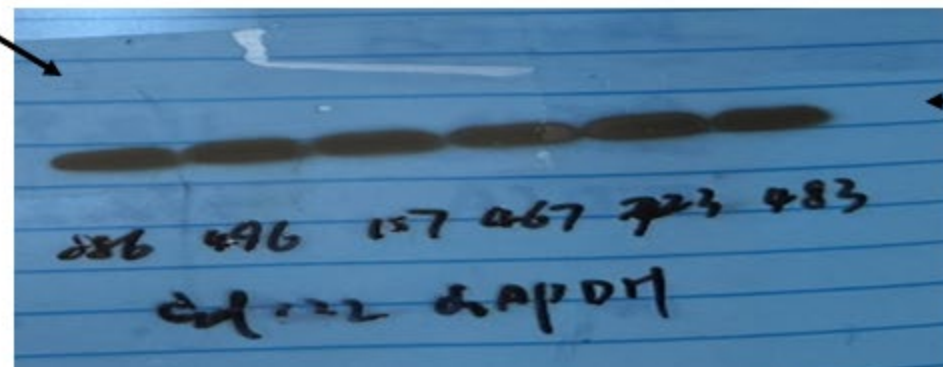

GAPDH  
37 KDa
